# Supplementary material for: A meal with mixed soy/whey proteins is as efficient as a whey meal in counteracting the age-related muscle anabolic resistance only if the protein content and leucine levels are increased
Source: Royal Society of Chemistry journal article supplement (doi:10.1039/c8fo01903g), 2018-01-01
Supplement: c8fo01903g1.pdf [file c8fo01903g1.pdf]

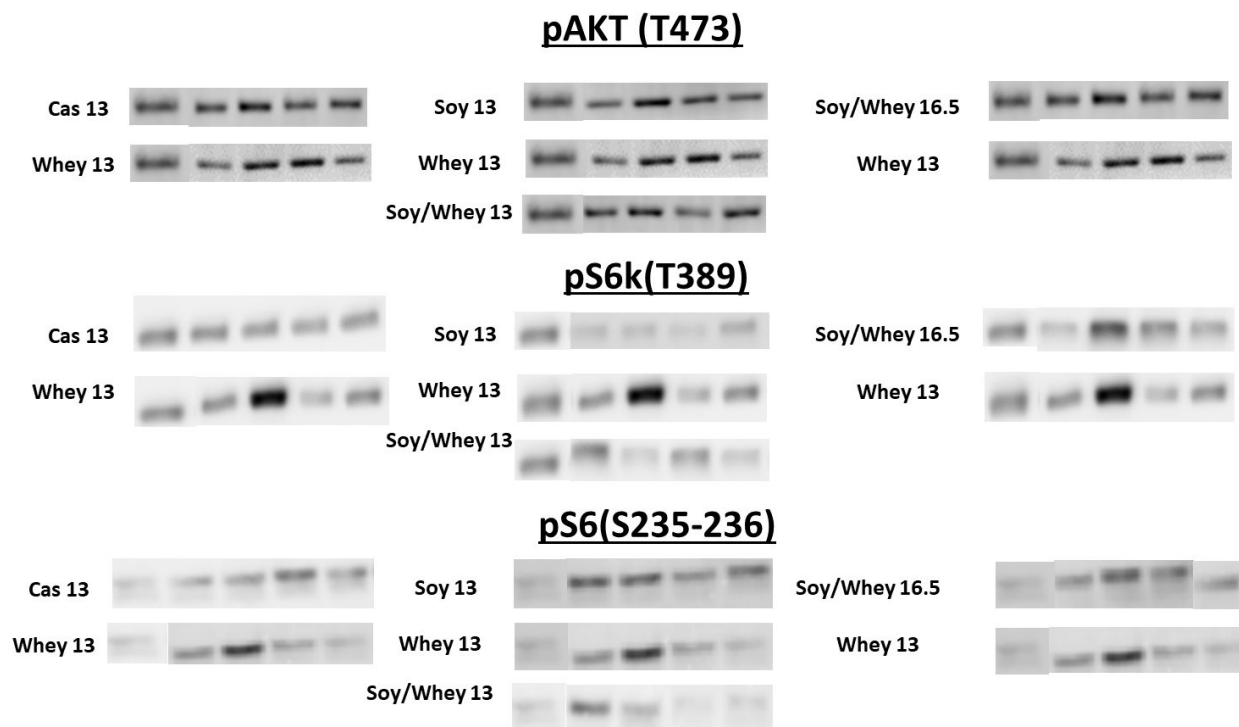

**Supplemental Figure 1:** Representative Western blots of muscle Akt, S6K<sub>1</sub> and S6 activation measured after different time point following the ingestion of the experimental diets.
